# Supplementary material for: Hospitalization Trends for Acute Appendicitis in Spain, 1998 to 2017
Source: MDPI journal article supplement (doi:10.3390/ijerph182312718), 2021-12-02
Supplement: s1 [file s1]

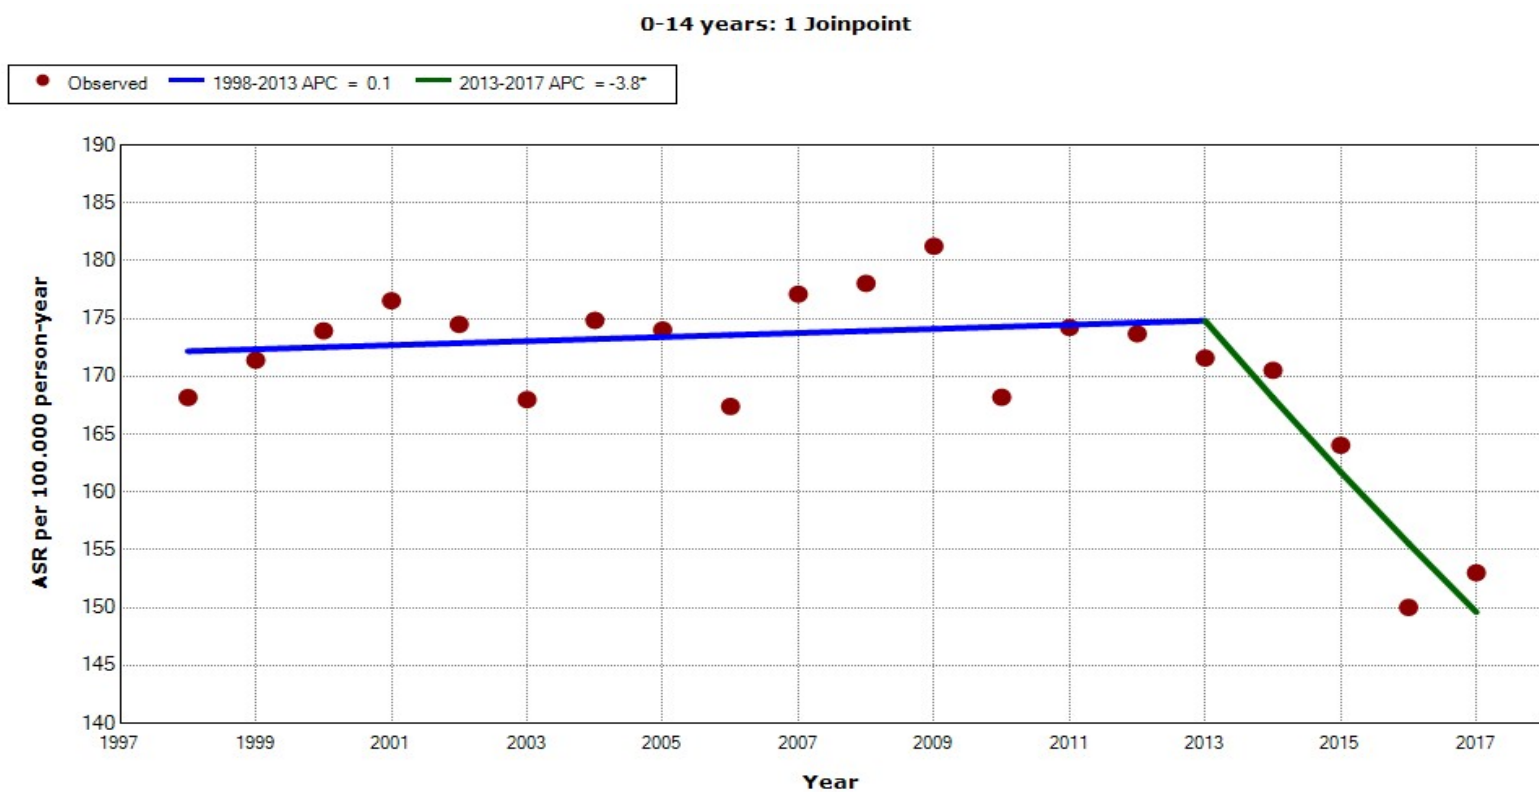

\* Indicates that the Annual Percent Change (APC) is significantly different from zero at the  $\alpha = 0.05$  level.  
Final Selected Model: 1 Joinpoint.

ARS: Annual Standardized rate

**Supplementary Figure S1.** Age-standardized rate of hospital admissions due to acute appendicitis per 100,000 population, in male aged 0 to 14 years in Spain, 1998 to 2017.

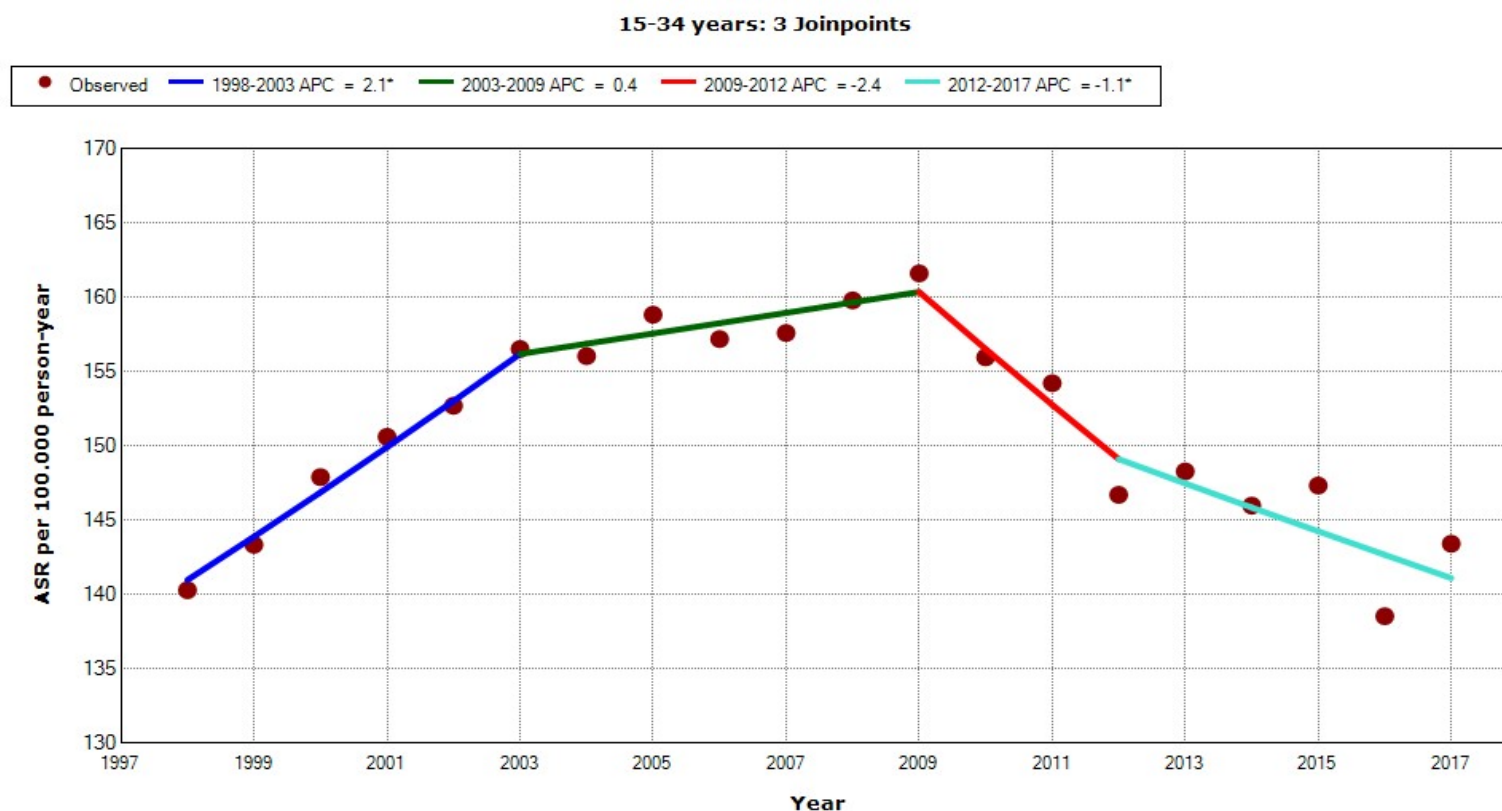

\* Indicates that the Annual Percent Change (APC) is significantly different from zero at the alpha = 0.05 level.  
Final Selected Model: 3 Joinpoints.

ARS: Annual Standardized rate

**Supplementary Figure S2** Age-standardized rate of hospital admissions due to acute appendicitis per 100,000 population, in male aged 15 to 34 years in Spain, 1998 to 2017.

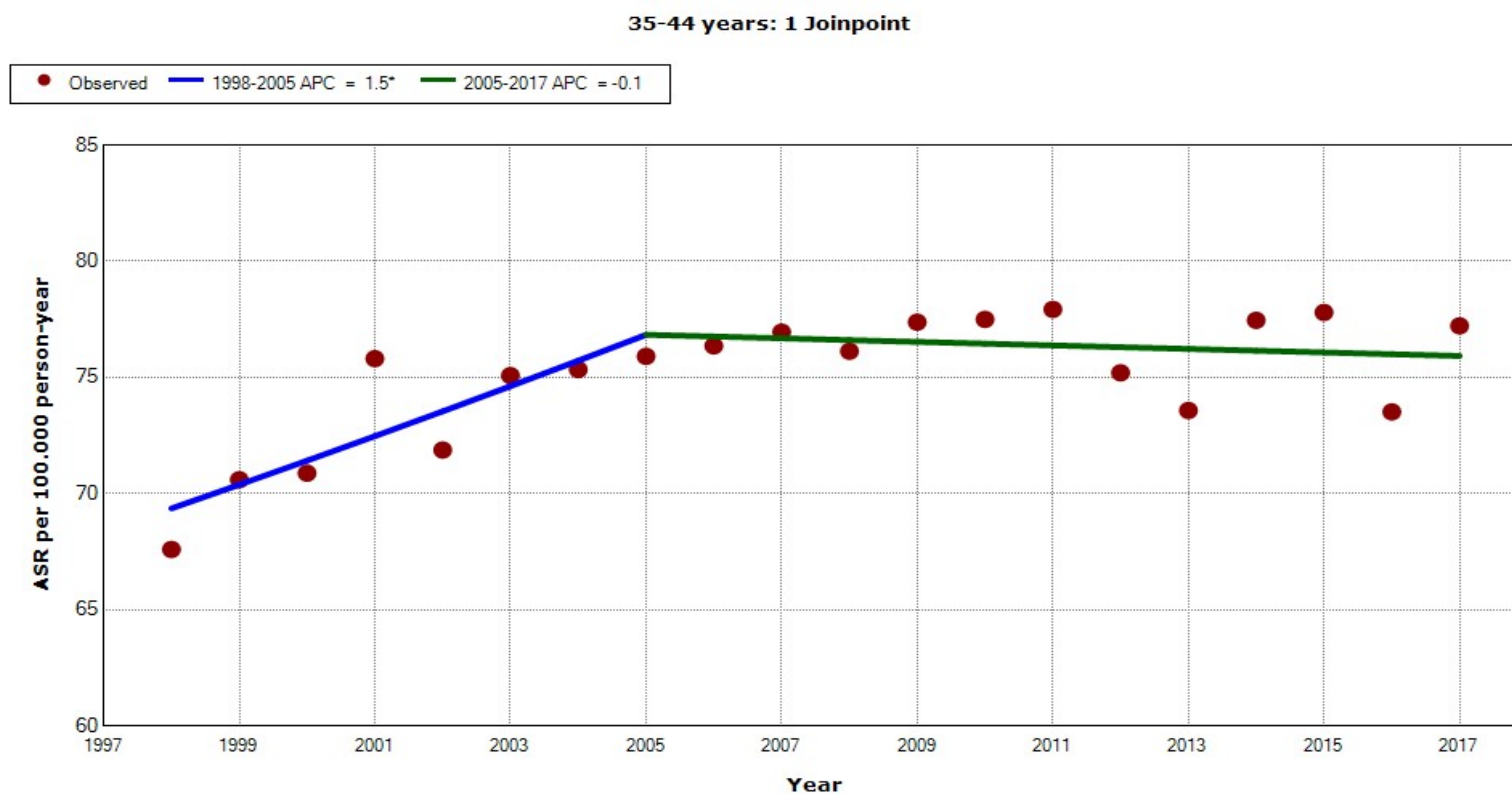

\* Indicates that the Annual Percent Change (APC) is significantly different from zero at the alpha = 0.05 level.  
Final Selected Model: 1 Joinpoint.

ARS: Annual Standardized rate

**Supplementary Figure S3.** Age-standardized rate of hospital admissions due to acute appendicitis per 100,000 population, in male aged 35 to 44 years in Spain, 1998 to 2017.

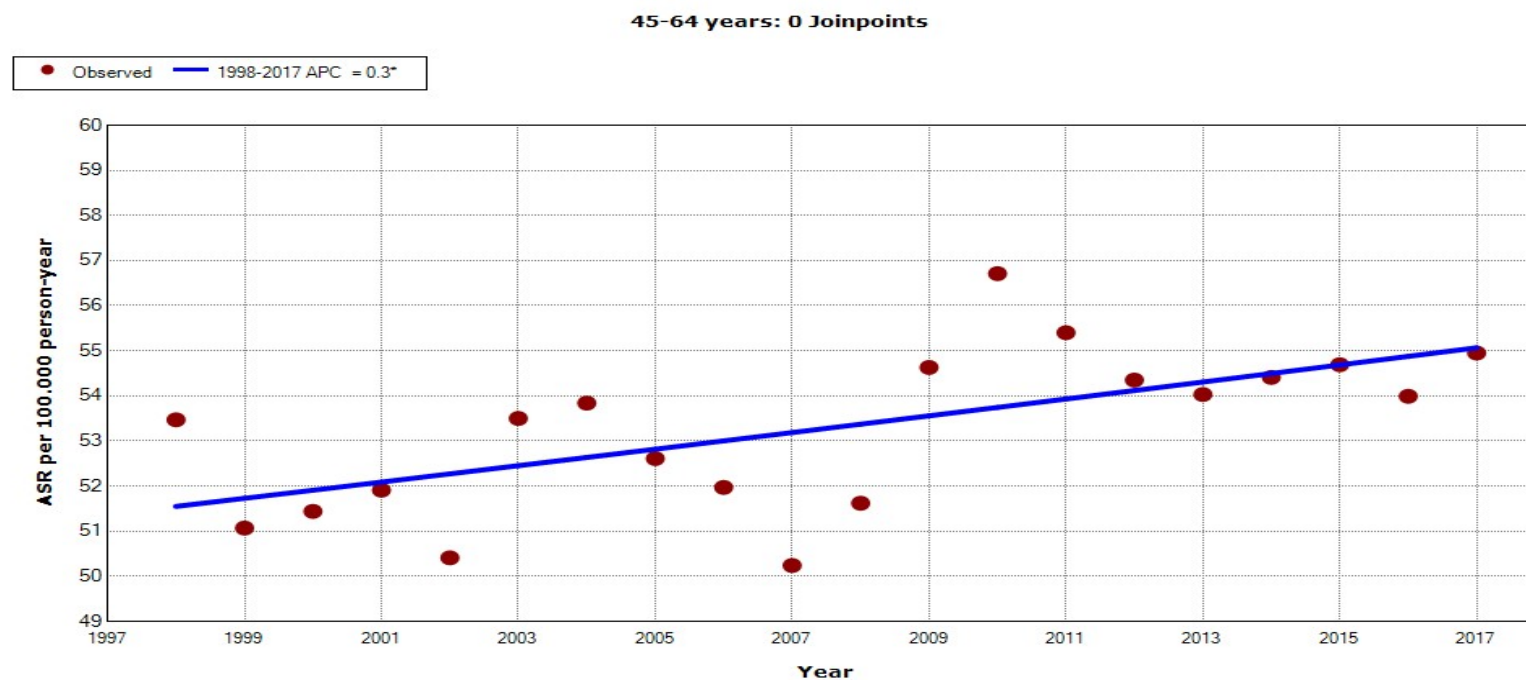

\* Indicates that the Annual Percent Change (APC) is significantly different from zero at the alpha = 0.05 level.  
Final Selected Model: 0 Joinpoints.

ARS: Annual Standardized rate

**Supplementary Figure S4.** Age-standardized rate of hospital admissions due to acute appendicitis per 100,000 population, in male aged 45 to 64 years in Spain, 1998 to 2017.

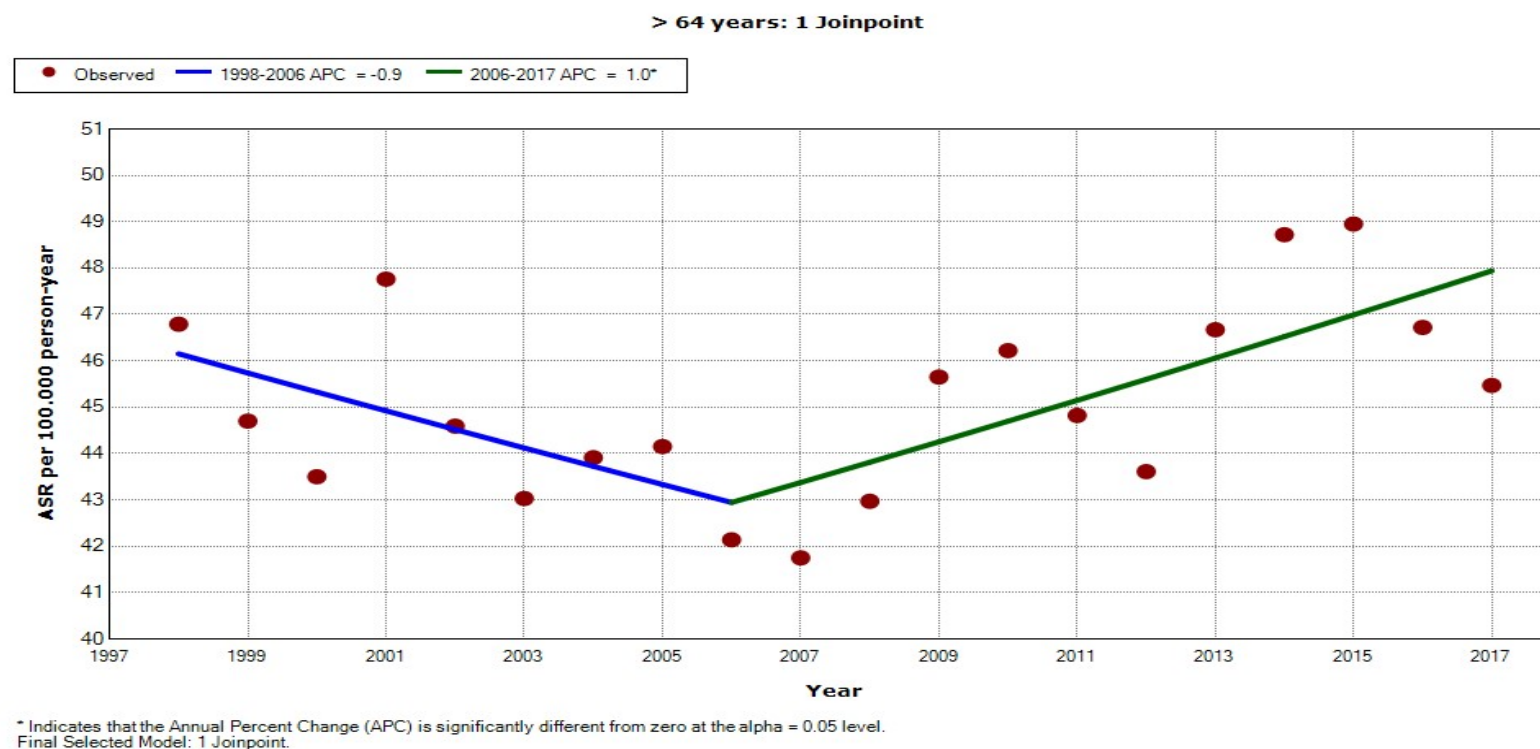

ARS: Annual Standardized rate

**Supplementary Figure S5.** Age-standardized rate of hospital admissions due to acute appendicitis per 100,000 population, in male aged 65 years or older in Spain, 1998 to 2017.

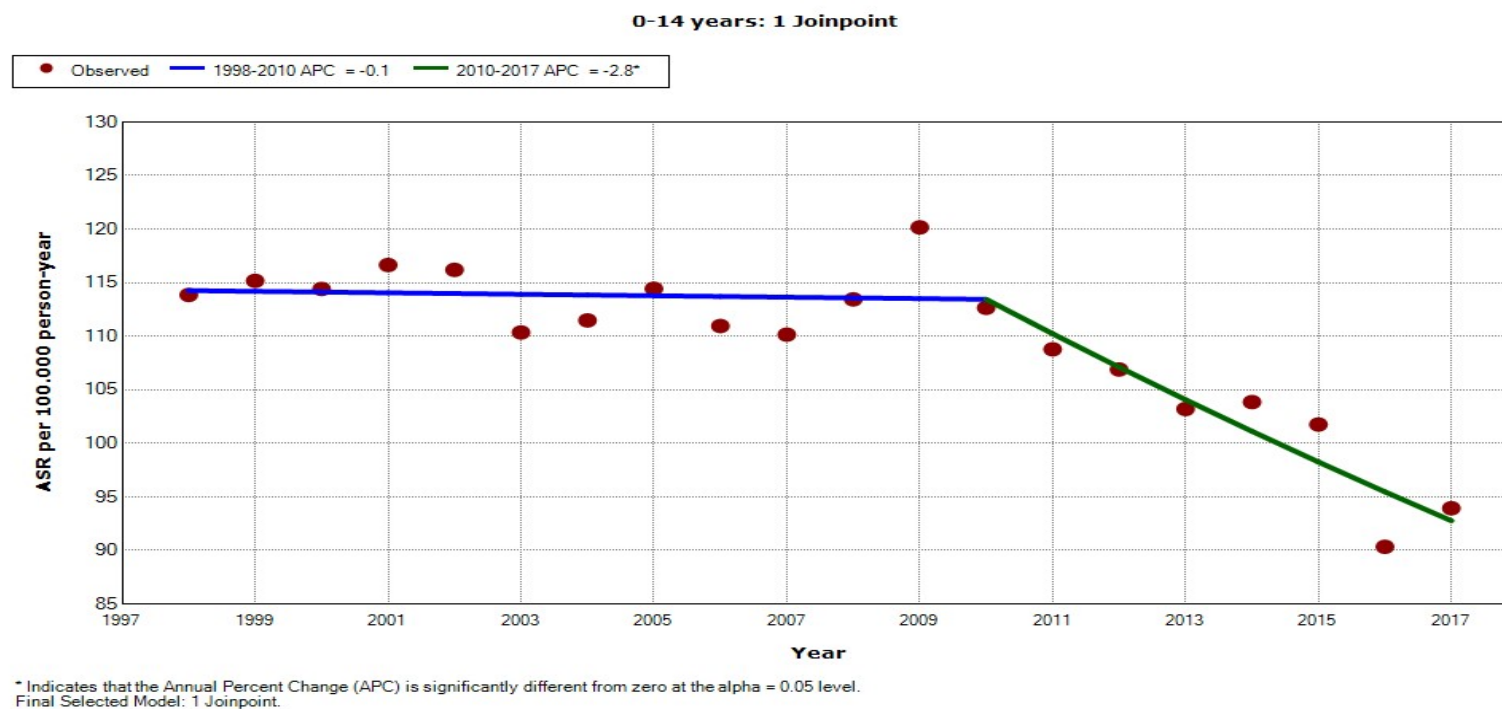

ARS: Annual Standardized rate

**Supplementary Figure S6.** Age-standardized rate of hospital admissions due to acute appendicitis per 100,000 population, in female aged 0 to 14 years in Spain, 1998 to 2017.

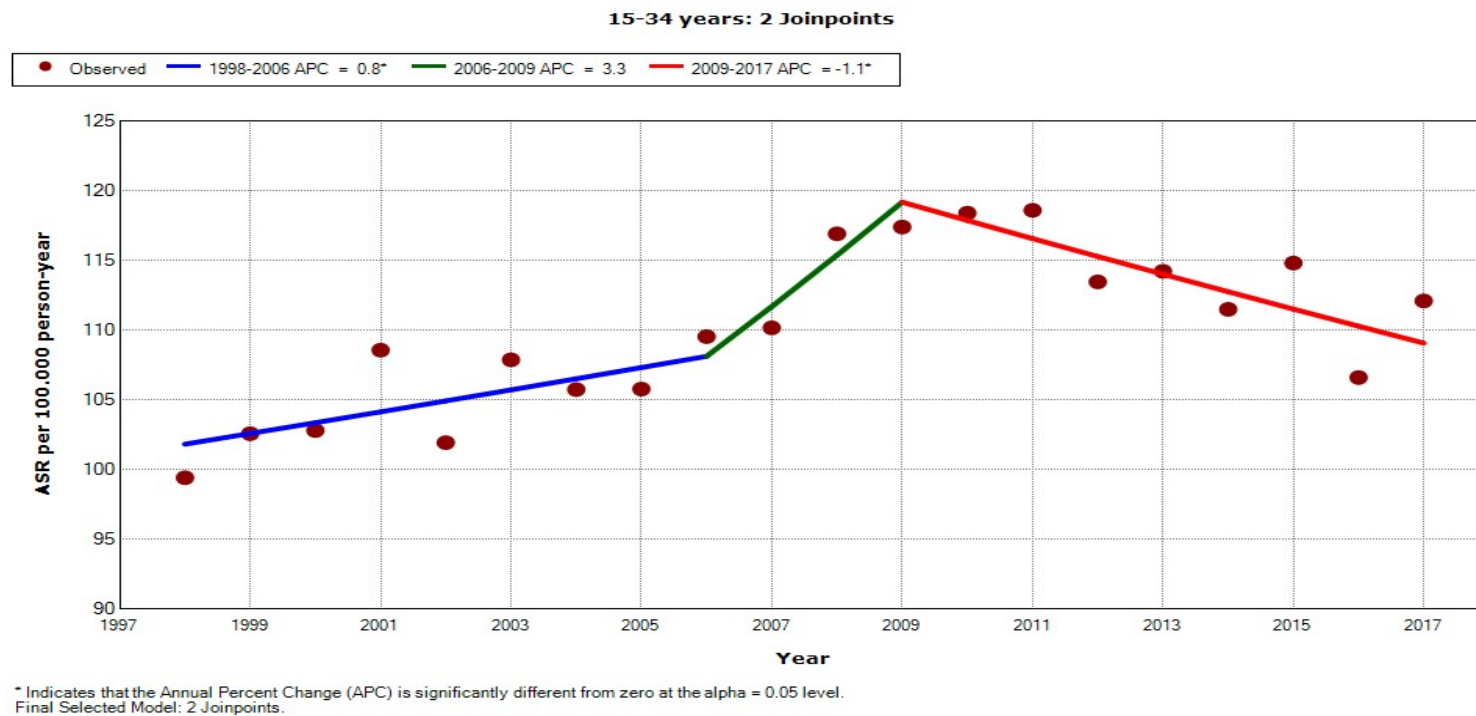

ARS: Annual Standardized rate

**Supplementary Figure S7.** Age-standardized rate of hospital admissions due to acute appendicitis per 100,000 population, in female aged 15 to 34 years in Spain, 1998 to 2017.

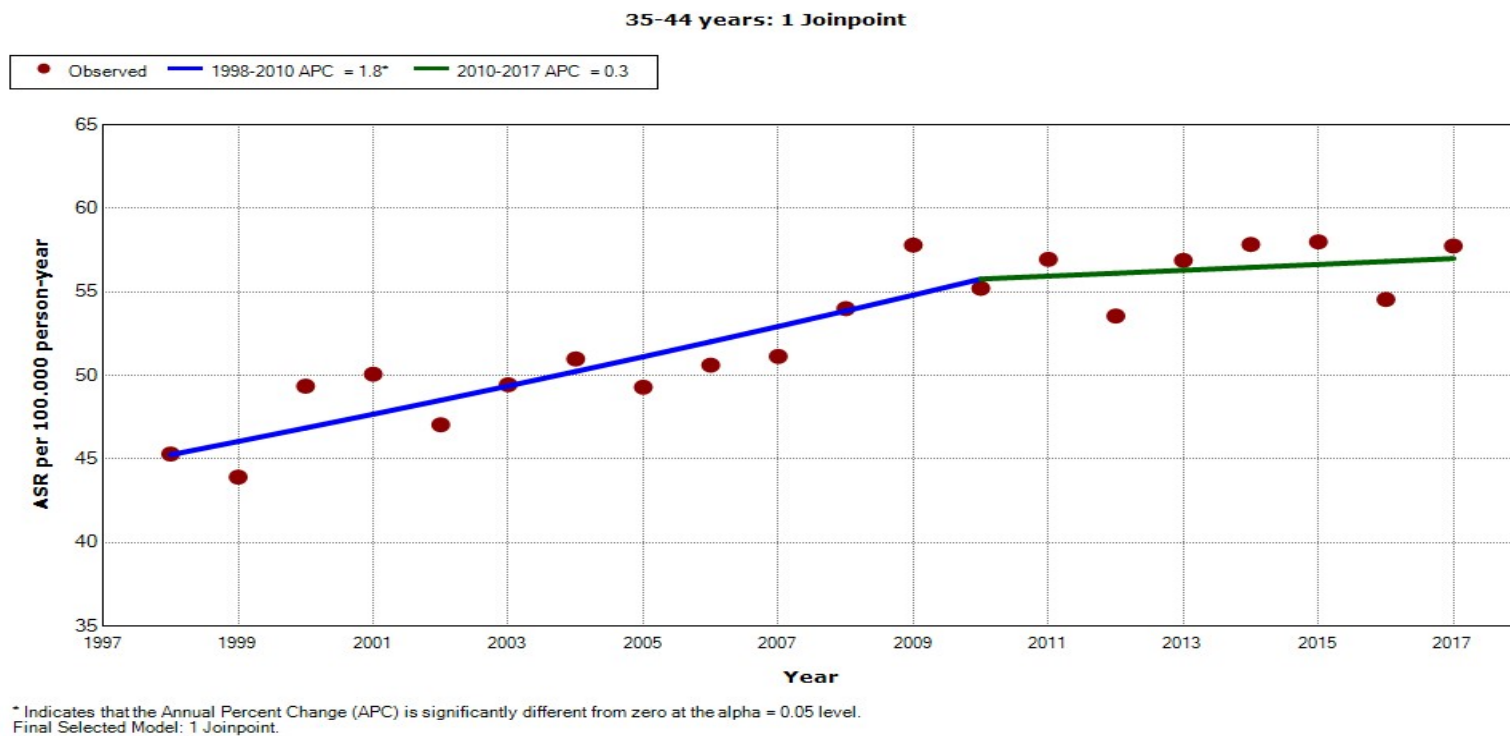

ARS: Annual Standardized rate

**Supplementary Figure S8.** Age-standardized rate of hospital admissions due to acute appendicitis per 100,000 population, in female aged 35 to 44 years in Spain, 1998 to 2017.

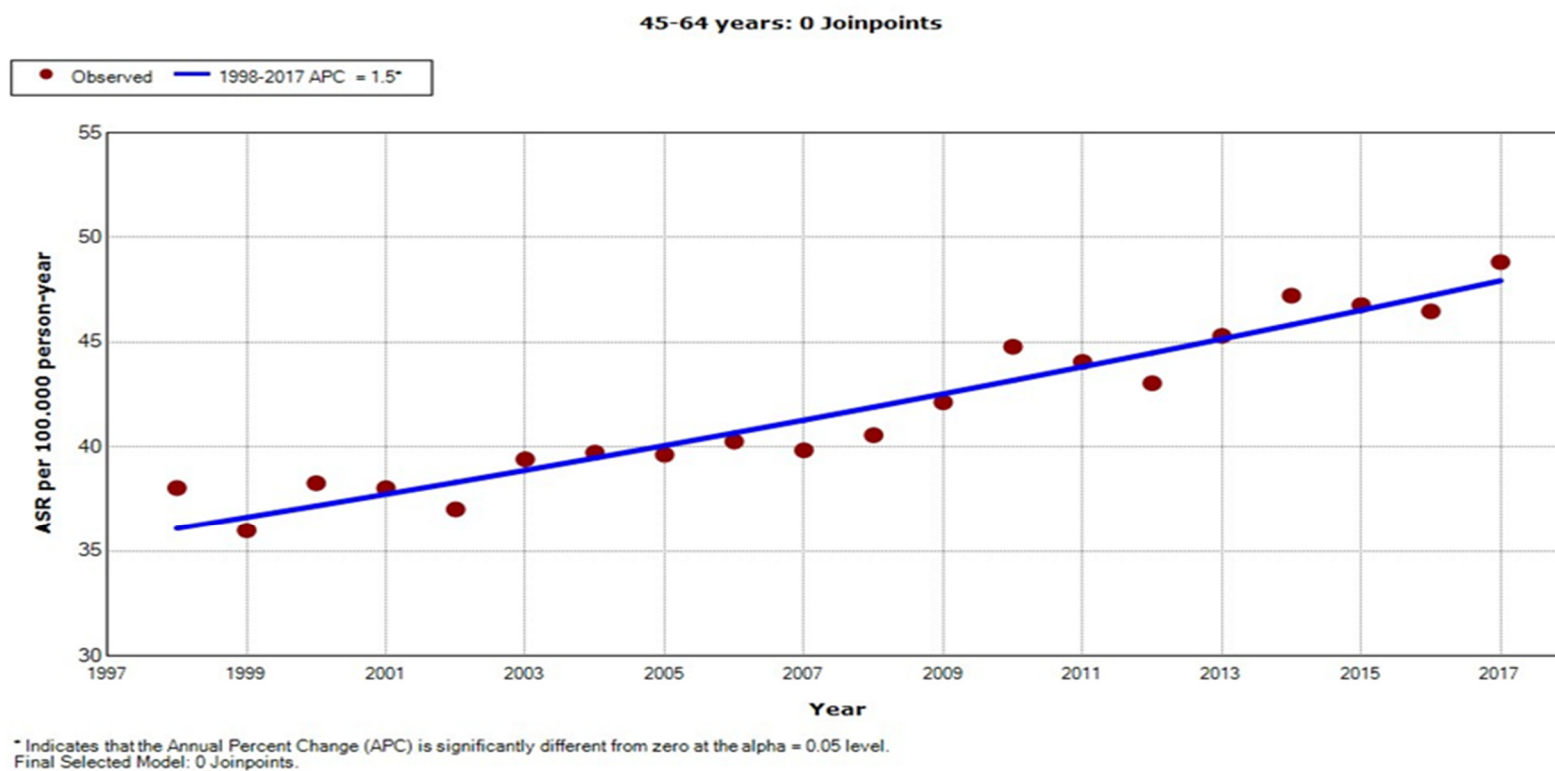

ARS: Annual Standardized rate

**Supplementary Figure S9.** Age-standardized rate of hospital admissions due to acute appendicitis per 100,000 population, in female aged 45 to 64 years in Spain, 1998 to 2017.

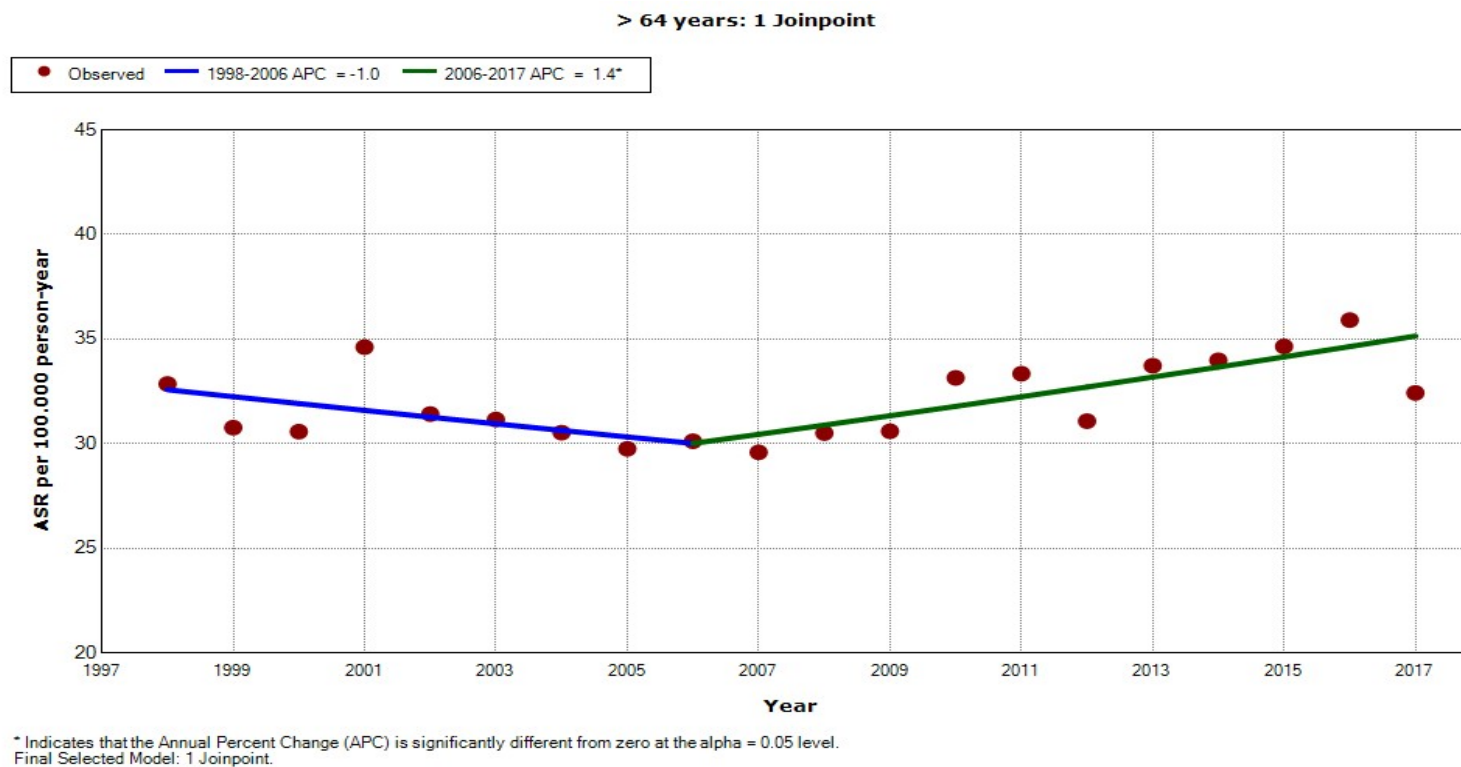

ARS: Annual Standardized rate

**Supplementary Figure S10.** Age-standardized rate of hospital admissions due to acute appendicitis per 100,000 population, in female aged 65 years or older in Spain, 1998 to 2017.

**Supplementary Table S1.** Age-standardized rates (ASR) for hospital admissions due to acute appendicitis, by sex and age groups, 1998 to 2017.

| Gender | Year | All ages |       |               | 0-14 years |       |               | 15-34 years |       |               | 35-44 years |      |             | 45-64 years |      |             | ≥ 65 years |      |             |
|--------|------|----------|-------|---------------|------------|-------|---------------|-------------|-------|---------------|-------------|------|-------------|-------------|------|-------------|------------|------|-------------|
|        |      | n        | ASR   | 95% CI        | n          | ASR   | 95% CI        | n           | ASR   | 95% CI        | n           | ASR  | 95% CI      | n           | ASR  | 95% CI      | n          | ASR  | 95% CI      |
| Male   | 1998 | 20445    | 95.0  | (93.7-96.4)   | 5709       | 168.2 | (163.8-172.5) | 9201        | 140.3 | (137.4-143.1) | 1934        | 67.6 | (64.6-70.6) | 2314        | 53.5 | (51.3-55.7) | 1287       | 46.8 | (44.2-49.4) |
|        | 1999 | 20630    | 95.7  | (94.3-97.0)   | 5730       | 171.4 | (166.9-175.8) | 9288        | 143.3 | (140.4-146.2) | 2077        | 70.6 | (67.5-73.6) | 2250        | 51.1 | (49.0-53.2) | 1285       | 44.7 | (42.2-47.2) |
|        | 2000 | 20917    | 97.1  | (95.7-98.4)   | 5711       | 173.9 | (169.4-178.5) | 9489        | 147.9 | (144.9-150.9) | 2162        | 70.9 | (67.9-73.9) | 2283        | 51.4 | (49.3-53.6) | 1272       | 43.5 | (41.1-45.9) |
|        | 2001 | 21578    | 99.8  | (98.5-101.2)  | 5731       | 176.5 | (171.9-181.1) | 9652        | 150.6 | (147.6-153.6) | 2414        | 75.8 | (72.8-78.8) | 2348        | 51.9 | (49.8-54.0) | 1433       | 47.8 | (45.2-50.3) |
|        | 2002 | 21589    | 98.4  | (97.1-99.8)   | 5675       | 174.5 | (169.9-179.0) | 9823        | 152.7 | (149.6-155.7) | 2382        | 71.9 | (69.0-74.8) | 2335        | 50.4 | (48.4-52.5) | 1374       | 44.6 | (42.2-47.0) |
|        | 2003 | 22101    | 99.2  | (97.9-100.5)  | 5510       | 168.0 | (163.5-172.4) | 10115       | 156.5 | (153.4-159.6) | 2584        | 75.1 | (72.2-78.0) | 2550        | 53.5 | (51.4-55.6) | 1342       | 43.0 | (40.7-45.4) |
|        | 2004 | 22392    | 100.5 | (99.2-101.9)  | 5752       | 174.8 | (170.3-179.4) | 9971        | 156.0 | (152.9-159.1) | 2652        | 75.3 | (72.5-78.2) | 2645        | 53.8 | (51.8-55.9) | 1372       | 43.9 | (41.5-46.3) |
|        | 2005 | 22811    | 100.9 | (99.5-102.2)  | 5768       | 174.0 | (169.5-178.5) | 10201       | 158.8 | (155.7-161.9) | 2761        | 75.9 | (73.1-78.7) | 2702        | 52.6 | (50.6-54.6) | 1379       | 44.1 | (41.8-46.5) |
|        | 2006 | 22531    | 98.9  | (97.5-100.2)  | 5583       | 167.4 | (163.0-171.8) | 10009       | 157.2 | (154.0-160.3) | 2849        | 76.3 | (73.5-79.2) | 2744        | 52.0 | (50.0-53.9) | 1346       | 42.1 | (39.9-44.4) |
|        | 2007 | 22899    | 100.1 | (98.8-101.5)  | 5957       | 177.1 | (172.6-181.6) | 9958        | 157.6 | (154.4-160.7) | 2927        | 76.9 | (74.2-79.7) | 2710        | 50.2 | (48.3-52.1) | 1347       | 41.8 | (39.5-44.0) |
|        | 2008 | 23515    | 101.3 | (100-102.6)   | 6089       | 178.0 | (173.6-182.5) | 10158       | 159.8 | (156.6-162.9) | 2995        | 76.1 | (73.4-78.9) | 2880        | 51.6 | (49.7-53.5) | 1393       | 43.0 | (40.7-45.3) |
|        | 2009 | 24175    | 103.8 | (102.5-105.1) | 6298       | 181.2 | (176.8-185.7) | 10147       | 161.6 | (158.4-164.8) | 3102        | 77.4 | (74.6-80.1) | 3117        | 54.6 | (52.7-56.6) | 1511       | 45.7 | (43.3-48.0) |
|        | 2010 | 23488    | 100.9 | (99.6-102.2)  | 5939       | 168.2 | (163.9-172.5) | 9526        | 155.9 | (152.8-159.1) | 3140        | 77.5 | (74.8-80.2) | 3316        | 56.7 | (54.8-58.6) | 1567       | 46.2 | (43.9-48.5) |
|        | 2011 | 23436    | 101.0 | (99.6-102.3)  | 6245       | 174.2 | (169.9-178.5) | 9147        | 154.2 | (151.0-157.4) | 3192        | 77.9 | (75.2-80.6) | 3303        | 55.4 | (53.5-57.3) | 1549       | 44.8 | (42.6-47.1) |
|        | 2012 | 22638    | 98.2  | (96.9-99.5)   | 6309       | 173.7 | (169.4-178.0) | 8397        | 146.7 | (143.5-149.9) | 3104        | 75.2 | (72.5-77.8) | 3296        | 54.4 | (52.5-56.2) | 1532       | 43.6 | (41.4-45.8) |
|        | 2013 | 22505    | 98.5  | (97.2-99.8)   | 6293       | 171.6 | (167.3-175.8) | 8191        | 148.3 | (145.0-151.5) | 3031        | 73.6 | (71-76.2.0) | 3328        | 54.0 | (52.2-55.9) | 1662       | 46.7 | (44.4-48.9) |
|        | 2014 | 22379    | 98.8  | (97.5-100.1)  | 6308       | 170.5 | (166.3-174.7) | 7755        | 146.0 | (142.7-149.2) | 3163        | 77.4 | (74.7-80.1) | 3382        | 54.4 | (52.6-56.3) | 1771       | 48.7 | (46.4-51.0) |
|        | 2015 | 22132    | 98.2  | (96.9-99.5)   | 6125       | 164.0 | (159.9-168.1) | 7632        | 147.3 | (144.0-150.6) | 3139        | 77.8 | (75.1-80.5) | 3434        | 54.7 | (52.8-56.5) | 1802       | 49.0 | (46.7-51.2) |
|        | 2016 | 20820    | 92.5  | (91.2-93.7)   | 5630       | 150.0 | (146.1-153.9) | 7071        | 138.5 | (135.3-141.8) | 2931        | 73.5 | (70.9-76.2) | 3453        | 54.0 | (52.2-55.8) | 1735       | 46.7 | (44.5-48.9) |
|        | 2017 | 21329    | 94.7  | (93.4-95.9)   | 5780       | 153.0 | (149.1-157.0) | 7235        | 143.4 | (140.1-146.7) | 3026        | 77.2 | (74.5-80.0) | 3571        | 54.9 | (53.1-56.8) | 1717       | 45.5 | (43.3-47.6) |
| Female | 1998 | 14201    | 66.0  | (64.9-67.1)   | 3667       | 113.9 | (110.1-117.6) | 6283        | 99.4  | (96.9-101.9)  | 1298        | 45.3 | (42.8-47.8) | 1710        | 38.0 | (36.2-39.9) | 1243       | 32.9 | (31.0-34.7) |
|        | 1999 | 14132    | 65.9  | (64.8-67.0)   | 3614       | 115.2 | (111.4-118.9) | 6384        | 102.6 | (100.0-105.1) | 1291        | 43.9 | (41.5-46.3) | 1640        | 36.0 | (34.2-37.7) | 1203       | 30.8 | (29.0-32.5) |
|        | 2000 | 14360    | 67.1  | (66.0-68.2)   | 3547       | 114.4 | (110.6-118.2) | 6334        | 102.8 | (100.2-105.3) | 1504        | 49.3 | (46.8-51.8) | 1759        | 38.3 | (36.5-40.1) | 1216       | 30.6 | (28.8-32.3) |
|        | 2001 | 14976    | 69.7  | (68.6-70.9)   | 3566       | 116.7 | (112.8-120.5) | 6652        | 108.6 | (105.9-111.2) | 1575        | 50.1 | (47.6-52.5) | 1774        | 38.0 | (36.3-39.8) | 1409       | 34.6 | (32.8-36.4) |
|        | 2002 | 14365    | 66.7  | (65.6-67.8)   | 3552       | 116.2 | (112.4-120.0) | 6222        | 101.9 | (99.4-104.5)  | 1530        | 47.0 | (44.7-49.4) | 1758        | 37.0 | (35.3-38.8) | 1303       | 31.4 | (29.7-33.1) |
|        | 2003 | 14913    | 68.1  | (67.0-69.2)   | 3419       | 110.4 | (106.6-114.1) | 6596        | 107.9 | (105.2-110.5) | 1659        | 49.4 | (47.1-51.8) | 1928        | 39.4 | (37.6-41.2) | 1311       | 31.2 | (29.5-32.8) |
|        | 2004 | 14875    | 67.9  | (66.8-69.1)   | 3455       | 111.5 | (107.8-115.2) | 6400        | 105.7 | (103.1-108.3) | 1739        | 51.0 | (48.6-53.4) | 1994        | 39.7 | (38.0-41.5) | 1287       | 30.5 | (28.8-32.2) |
|        | 2005 | 15037    | 68.0  | (66.9-69.1)   | 3579       | 114.4 | (110.7-118.2) | 6399        | 105.8 | (103.1-108.4) | 1728        | 49.3 | (47.0-51.6) | 2072        | 39.6 | (37.9-41.3) | 1259       | 29.8 | (28.1-31.4) |
|        | 2006 | 15333    | 68.8  | (67.7-69.9)   | 3491       | 111.0 | (107.3-114.6) | 6582        | 109.5 | (106.8-112.2) | 1804        | 50.6 | (48.3-53.0) | 2158        | 40.3 | (38.6-42.0) | 1298       | 30.1 | (28.5-31.8) |
|        | 2007 | 15375    | 68.6  | (67.5-69.7)   | 3503       | 110.1 | (106.5-113.8) | 6548        | 110.1 | (107.4-112.8) | 1855        | 51.1 | (48.8-53.5) | 2191        | 39.8 | (38.2-41.5) | 1278       | 29.6 | (27.9-31.2) |
|        | 2008 | 16295    | 71.6  | (70.5-72.7)   | 3670       | 113.4 | (109.8-117.1) | 6984        | 116.9 | (114.1-119.7) | 2012        | 54.0 | (51.6-56.4) | 2303        | 40.6 | (38.9-42.2) | 1326       | 30.5 | (28.8-32.2) |
|        | 2009 | 16905    | 73.8  | (72.7-74.9)   | 3954       | 120.2 | (116.4-123.9) | 6957        | 117.4 | (114.6-120.2) | 2192        | 57.8 | (55.4-60.2) | 2448        | 42.1 | (40.5-43.8) | 1354       | 30.6 | (28.9-32.2) |
|        | 2010 | 16886    | 73.6  | (72.5-74.7)   | 3766       | 112.7 | (109.1-116.3) | 6856        | 118.4 | (115.5-121.2) | 2118        | 55.2 | (52.9-57.6) | 2658        | 44.8 | (43.1-46.5) | 1488       | 33.1 | (31.4-34.8) |
|        | 2011 | 16795    | 73.1  | (72.0-74.2)   | 3691       | 108.8 | (105.3-112.3) | 6710        | 118.6 | (115.7-121.5) | 2208        | 56.9 | (54.6-59.3) | 2658        | 44.1 | (42.4-45.7) | 1528       | 33.3 | (31.6-35.0) |
|        | 2012 | 16085    | 70.4  | (69.3-71.5)   | 3672       | 106.9 | (103.4-110.4) | 6222        | 113.4 | (110.6-116.3) | 2095        | 53.5 | (51.3-55.8) | 2655        | 43.0 | (41.4-44.7) | 1441       | 31.1 | (29.4-32.7) |
|        | 2013 | 16292    | 71.5  | (70.4-72.6)   | 3588       | 103.2 | (99.8-106.6)  | 6054        | 114.2 | (111.3-117.1) | 2228        | 56.9 | (54.5-59.2) | 2840        | 45.3 | (43.6-47.0) | 1582       | 33.7 | (32.0-35.4) |
|        | 2014 | 16232    | 71.6  | (70.5-72.8)   | 3647       | 103.9 | (100.5-107.2) | 5745        | 111.5 | (108.6-114.4) | 2254        | 57.8 | (55.4-60.2) | 2980        | 47.2 | (45.5-48.9) | 1606       | 34.0 | (32.3-35.7) |
|        | 2015 | 16254    | 72.1  | (71.0-73.2)   | 3595       | 101.8 | (98.4-105.1)  | 5761        | 114.8 | (111.8-117.8) | 2244        | 58.0 | (55.6-60.4) | 2993        | 46.8 | (45.1-48.4) | 1661       | 34.6 | (32.9-36.3) |
|        | 2016 | 15333    | 67.9  | (66.8-69.0)   | 3203       | 90.3  | (87.2-93.5)   | 5270        | 106.6 | (103.7-109.5) | 2094        | 54.5 | (52.2-56.9) | 3019        | 46.5 | (44.8-48.1) | 1747       | 35.9 | (34.2-37.6) |

| Gender | Year | All ages |      |             | 0-14 years |      |             | 15-34 years |       |               | 35-44 years |      |             | 45-64 years |      |             | ≥ 65 years |      |             |
|--------|------|----------|------|-------------|------------|------|-------------|-------------|-------|---------------|-------------|------|-------------|-------------|------|-------------|------------|------|-------------|
|        |      | n        | ASR  | 95% CI      | n          | ASR  | 95% CI      | n           | ASR   | 95% CI        | n           | ASR  | 95% CI      | n           | ASR  | 95% CI      | n          | ASR  | 95% CI      |
|        | 2017 | 15823    | 70.2 | (69.1-71.3) | 3350       | 93.9 | (90.8-97.1) | 5475        | 112.1 | (109.1-115.1) | 2192        | 57.7 | (55.3-60.2) | 3216        | 48.8 | (47.1-50.5) | 1590       | 32.4 | (30.8-34.0) |

**Supplementary Table S2.** Mean length of stay (days) due to acute appendicitis, by sex and age group, 1998 to 2017.

| Gender | Year | All   |      |           | 0-14 years |      |           | 15-34 years |      |           | 35-44 years |      |           | 45-64 years |      |           | > 64 years |      |           |
|--------|------|-------|------|-----------|------------|------|-----------|-------------|------|-----------|-------------|------|-----------|-------------|------|-----------|------------|------|-----------|
|        |      | n     | Mean | 95% CI    | n          | Mean | 95% CI    | n           | Mean | 95% CI    | n           | Mean | 95% CI    | n           | Mean | 95% CI    | n          | Mean | 95% CI    |
| Male   | 1998 | 19200 | 4.6  | (4.6-4.6) | 5477       | 4.7  | (4.6-4.7) | 8959        | 4.0  | (4.0-4.1) | 1808        | 4.8  | (4.7-4.9) | 2034        | 5.7  | (5.6-5.8) | 922        | 6.8  | (6.6-6.9) |
|        | 1999 | 19464 | 4.5  | (4.4-4.5) | 5540       | 4.5  | (4.4-4.5) | 9021        | 3.9  | (3.9-4.0) | 1954        | 4.7  | (4.6-4.8) | 1979        | 5.5  | (5.4-5.7) | 970        | 6.6  | (6.5-6.8) |
|        | 2000 | 19654 | 4.4  | (4.4-4.5) | 5466       | 4.5  | (4.5-4.6) | 9213        | 3.8  | (3.8-3.9) | 2037        | 4.5  | (4.4-4.7) | 1990        | 5.4  | (5.3-5.6) | 948        | 6.7  | (6.5-6.9) |
|        | 2001 | 20298 | 4.3  | (4.3-4.4) | 5471       | 4.5  | (4.4-4.6) | 9411        | 3.8  | (3.7-3.8) | 2279        | 4.4  | (4.3-4.5) | 2061        | 5.3  | (5.2-5.4) | 1076       | 6.4  | (6.2-6.6) |
|        | 2002 | 20344 | 4.3  | (4.2-4.3) | 5434       | 4.4  | (4.4-4.5) | 9567        | 3.7  | (3.6-3.7) | 2262        | 4.5  | (4.4-4.6) | 2066        | 5.2  | (5.1-5.4) | 1015       | 6.5  | (6.3-6.6) |
|        | 2003 | 20850 | 4.2  | (4.1-4.2) | 5279       | 4.4  | (4.3-4.5) | 9841        | 3.6  | (3.6-3.6) | 2422        | 4.2  | (4.1-4.3) | 2287        | 5.1  | (5.0-5.2) | 1021       | 6.4  | (6.3-6.6) |
|        | 2004 | 21150 | 4.2  | (4.1-4.2) | 5511       | 4.3  | (4.2-4.4) | 9715        | 3.5  | (3.5-3.6) | 2529        | 4.3  | (4.2-4.4) | 2359        | 5.1  | (5.0-5.2) | 1036       | 6.5  | (6.3-6.7) |
|        | 2005 | 21620 | 4.1  | (4.0-4.1) | 5540       | 4.3  | (4.2-4.4) | 9943        | 3.5  | (3.4-3.5) | 2643        | 4.2  | (4.1-4.3) | 2448        | 5.0  | (4.9-5.1) | 1046       | 6.3  | (6.1-6.5) |
|        | 2006 | 21392 | 4.0  | (4.0-4.0) | 5349       | 4.2  | (4.2-4.3) | 9769        | 3.4  | (3.4-3.5) | 2732        | 4.0  | (3.9-4.1) | 2506        | 4.8  | (4.7-4.9) | 1036       | 6.2  | (6.0-6.4) |
|        | 2007 | 21727 | 3.9  | (3.9-3.9) | 5733       | 4.1  | (4.1-4.2) | 9732        | 3.3  | (3.3-3.3) | 2784        | 4.0  | (3.9-4.0) | 2450        | 4.8  | (4.7-4.9) | 1028       | 6.0  | (5.8-6.2) |
|        | 2008 | 22424 | 3.8  | (3.8-3.9) | 5892       | 4.1  | (4.0-4.2) | 9929        | 3.2  | (3.2-3.3) | 2882        | 3.9  | (3.8-4.0) | 2632        | 4.7  | (4.6-4.8) | 1089       | 5.9  | (5.7-6.0) |
|        | 2009 | 23143 | 3.7  | (3.7-3.8) | 6064       | 4.0  | (4.0-4.1) | 9980        | 3.1  | (3.1-3.2) | 2997        | 3.7  | (3.6-3.8) | 2890        | 4.4  | (4.3-4.5) | 1212       | 5.8  | (5.6-6.0) |
|        | 2010 | 22476 | 3.6  | (3.6-3.6) | 5731       | 3.8  | (3.8-3.9) | 9353        | 3.0  | (3.0-3.1) | 3037        | 3.5  | (3.4-3.6) | 3068        | 4.3  | (4.2-4.4) | 1287       | 5.6  | (5.4-5.7) |
|        | 2011 | 22523 | 3.5  | (3.5-3.6) | 6034       | 3.8  | (3.7-3.8) | 8975        | 2.9  | (2.9-2.9) | 3108        | 3.4  | (3.4-3.5) | 3093        | 4.2  | (4.1-4.3) | 1313       | 5.4  | (5.2-5.5) |
|        | 2012 | 21753 | 3.5  | (3.5-3.5) | 6087       | 3.7  | (3.6-3.7) | 8269        | 2.9  | (2.8-2.9) | 3000        | 3.4  | (3.3-3.4) | 3094        | 4.1  | (4.0-4.2) | 1303       | 5.5  | (5.3-5.6) |
|        | 2013 | 21633 | 3.4  | (3.4-3.5) | 6076       | 3.6  | (3.6-3.7) | 8056        | 2.8  | (2.7-2.8) | 2940        | 3.3  | (3.2-3.4) | 3144        | 4.1  | (4.0-4.2) | 1417       | 5.3  | (5.1-5.4) |
|        | 2014 | 21540 | 3.5  | (3.4-3.5) | 6103       | 3.6  | (3.5-3.7) | 7633        | 2.8  | (2.7-2.8) | 3087        | 3.3  | (3.2-3.3) | 3196        | 4.0  | (4.0-4.1) | 1521       | 5.4  | (5.3-5.5) |
|        | 2015 | 21295 | 3.4  | (3.4-3.4) | 5918       | 3.5  | (3.5-3.6) | 7503        | 2.7  | (2.7-2.8) | 3061        | 3.2  | (3.2-3.3) | 3254        | 4.0  | (3.9-4.0) | 1559       | 5.1  | (5.0-5.3) |
| Female | 2016 | 20051 | 3.5  | (3.5-3.5) | 5439       | 3.6  | (3.5-3.6) | 6946        | 2.9  | (2.8-2.9) | 2870        | 3.3  | (3.2-3.4) | 3287        | 4.0  | (3.9-4.1) | 1509       | 5.2  | (5.1-5.3) |
|        | 2017 | 20597 | 3.4  | (3.3-3.4) | 5608       | 3.5  | (3.5-3.6) | 7126        | 2.7  | (2.7-2.8) | 2957        | 3.2  | (3.1-3.2) | 3410        | 3.9  | (3.8-4.0) | 1496       | 5.0  | (4.8-5.1) |
|        | 1998 | 13416 | 4.5  | (4.4-4.5) | 3511       | 4.6  | (4.6-4.7) | 6186        | 3.7  | (3.7-3.8) | 1258        | 4.5  | (4.3-4.6) | 1513        | 5.5  | (5.3-5.6) | 948        | 6.7  | (6.6-6.9) |
|        | 1999 | 13398 | 4.4  | (4.3-4.4) | 3469       | 4.6  | (4.6-4.7) | 6257        | 3.6  | (3.6-3.7) | 1240        | 4.4  | (4.2-4.5) | 1479        | 5.3  | (5.1-5.4) | 953        | 6.5  | (6.3-6.7) |
|        | 2000 | 13576 | 4.3  | (4.3-4.4) | 3380       | 4.6  | (4.5-4.6) | 6212        | 3.6  | (3.5-3.6) | 1439        | 4.4  | (4.2-4.5) | 1582        | 5.2  | (5.1-5.3) | 963        | 6.7  | (6.5-6.8) |
|        | 2001 | 14180 | 4.3  | (4.2-4.3) | 3410       | 4.6  | (4.5-4.7) | 6538        | 3.6  | (3.5-3.6) | 1523        | 4.1  | (4.0-4.2) | 1601        | 5.1  | (4.9-5.2) | 1108       | 6.3  | (6.1-6.4) |
|        | 2002 | 13559 | 4.2  | (4.1-4.2) | 3372       | 4.5  | (4.4-4.6) | 6103        | 3.5  | (3.4-3.5) | 1468        | 4.1  | (4.0-4.2) | 1610        | 4.8  | (4.7-4.9) | 1006       | 6.1  | (5.9-6.3) |
|        | 2003 | 14041 | 4.1  | (4.1-4.1) | 3253       | 4.5  | (4.4-4.6) | 6433        | 3.4  | (3.4-3.5) | 1587        | 3.9  | (3.8-4.0) | 1758        | 4.9  | (4.8-5.0) | 1010       | 6.3  | (6.1-6.5) |
|        | 2004 | 14093 | 4.0  | (4.0-4.1) | 3314       | 4.3  | (4.2-4.4) | 6256        | 3.4  | (3.4-3.4) | 1673        | 3.8  | (3.7-3.9) | 1832        | 4.8  | (4.7-4.9) | 1018       | 6.1  | (6.0-6.3) |
|        | 2005 | 14250 | 4.0  | (3.9-4.0) | 3427       | 4.3  | (4.2-4.4) | 6258        | 3.3  | (3.3-3.3) | 1656        | 3.9  | (3.8-4.0) | 1925        | 4.6  | (4.5-4.7) | 984        | 6.1  | (5.9-6.3) |
|        | 2006 | 14607 | 3.9  | (3.9-4.0) | 3350       | 4.3  | (4.3-4.4) | 6469        | 3.2  | (3.2-3.3) | 1736        | 3.8  | (3.7-3.9) | 2000        | 4.4  | (4.3-4.5) | 1052       | 6.1  | (5.9-6.2) |
|        | 2007 | 14705 | 3.9  | (3.8-3.9) | 3372       | 4.2  | (4.1-4.3) | 6435        | 3.2  | (3.2-3.3) | 1796        | 3.7  | (3.6-3.8) | 2029        | 4.4  | (4.3-4.5) | 1073       | 6.0  | (5.8-6.2) |
|        | 2008 | 15659 | 3.8  | (3.7-3.8) | 3522       | 4.1  | (4.0-4.2) | 6888        | 3.1  | (3.1-3.1) | 1955        | 3.5  | (3.4-3.6) | 2183        | 4.4  | (4.3-4.5) | 1111       | 5.8  | (5.6-6.0) |
|        | 2009 | 16288 | 3.6  | (3.6-3.6) | 3812       | 4.0  | (3.9-4.0) | 6862        | 2.9  | (2.9-3.0) | 2143        | 3.4  | (3.3-3.5) | 2306        | 4.1  | (4.0-4.2) | 1165       | 5.6  | (5.5-5.8) |
|        | 2010 | 16231 | 3.5  | (3.5-3.6) | 3605       | 3.9  | (3.9-4.0) | 6764        | 2.9  | (2.8-2.9) | 2074        | 3.2  | (3.1-3.3) | 2519        | 4.0  | (3.9-4.1) | 1269       | 5.5  | (5.4-5.7) |
|        | 2011 | 16225 | 3.4  | (3.4-3.5) | 3553       | 3.8  | (3.8-3.9) | 6632        | 2.7  | (2.7-2.8) | 2146        | 3.1  | (3.1-3.2) | 2553        | 3.9  | (3.8-4.0) | 1341       | 5.3  | (5.1-5.4) |
|        | 2012 | 15524 | 3.4  | (3.4-3.5) | 3529       | 3.8  | (3.7-3.9) | 6156        | 2.8  | (2.7-2.8) | 2049        | 3.1  | (3.0-3.2) | 2532        | 3.8  | (3.8-3.9) | 1258       | 5.2  | (5.1-5.4) |
|        | 2013 | 15738 | 3.4  | (3.3-3.4) | 3452       | 3.8  | (3.7-3.8) | 5991        | 2.6  | (2.6-2.7) | 2169        | 3.0  | (3.0-3.1) | 2726        | 3.8  | (3.7-3.9) | 1400       | 5.2  | (5.0-5.3) |
|        | 2014 | 15677 | 3.4  | (3.4-3.4) | 3520       | 3.8  | (3.7-3.8) | 5680        | 2.7  | (2.6-2.7) | 2202        | 3.1  | (3.0-3.2) | 2855        | 3.7  | (3.6-3.8) | 1420       | 5.2  | (5.0-5.3) |
|        | 2015 | 15754 | 3.3  | (3.3-3.4) | 3470       | 3.6  | (3.5-3.7) | 5694        | 2.7  | (2.6-2.7) | 2205        | 3.0  | (2.9-3.0) | 2894        | 3.7  | (3.6-3.8) | 1491       | 5.1  | (4.9-5.2) |

| Gender | Year | All   |      |           | 0-14 years |      |           | 15-34 years |      |           | 35-44 years |      |           | 45-64 years |      |           | > 64 years |      |           |
|--------|------|-------|------|-----------|------------|------|-----------|-------------|------|-----------|-------------|------|-----------|-------------|------|-----------|------------|------|-----------|
|        |      | n     | Mean | 95% CI    | n          | Mean | 95% CI    | n           | Mean | 95% CI    | n           | Mean | 95% CI    | n           | Mean | 95% CI    | n          | Mean | 95% CI    |
|        | 2016 | 14760 | 3.4  | (3.4-3.5) | 3062       | 3.6  | (3.5-3.7) | 5217        | 2.8  | (2.7-2.8) | 2053        | 3.1  | (3.0-3.2) | 2885        | 3.8  | (3.7-3.9) | 1543       | 5.1  | (5.0-5.3) |
|        | 2017 | 15311 | 3.3  | (3.3-3.3) | 3221       | 3.7  | (3.6-3.7) | 5424        | 2.6  | (2.6-2.7) | 2158        | 3.0  | (2.9-3.1) | 3104        | 3.5  | (3.5-3.6) | 1404       | 5.0  | (4.8-5.1) |
